# Supplementary material for: A Multilayer Genetic Algorithm for Automated Guided Vehicles and Dual Automated Yard Cranes Coordinated Scheduling
Source: Hindawi journal article supplement (doi:10.1155/2020/5637874), 2020-11-17
Supplement: f1 [file 5637874.f1.pdf]

| 序号 | The number of containers | CPLEX  |             |                           | C               |               |              |
|----|--------------------------|--------|-------------|---------------------------|-----------------|---------------|--------------|
|    |                          | T      | time of AGV | energy consumption of AGV | the time of AYC | energy of AYC | total energy |
| 1  | 8                        | 3.34   | 568         | 2.761111111               | 146             | 0.9125        | 3.6736111    |
| 2  | 9                        | 6.59   | 593         | 2.882638889               | 164             | 1.025         | 3.9076389    |
| 3  | 10                       | 10.25  | 711         | 3.45625                   | 235.9           | 1.474375      | 4.930625     |
| 4  | 15                       | 104.56 | 839         | 4.078472222               | 593.2           | 3.7075        | 7.7859722    |
| 5  | 20                       | 454.63 | 1018        | 4.948611111               | 641             | 4.00625       | 8.9548611    |
| 6  | 25                       | 637.53 | 1203        | 5.847916667               | 683.4           | 4.27125       | 10.119167    |
| 7  | 30                       | 800.29 | 1302        | 6.329166667               | 834.6           | 5.21625       | 11.545417    |
| 8  | 40                       | 3844   | 1531        | 7.442361111               | 932.5           | 5.828125      | 13.270486    |
| 9  | 50                       | -      | -           | -                         | -               | -             | -            |
| 10 | 100                      | -      | -           | -                         | -               | -             | -            |

GA  
T C

|      | time<br>of AGV | energy<br>of AGV | time of<br>AYC | energy of<br>AYC | total<br>energy | DOV          |
|------|----------------|------------------|----------------|------------------|-----------------|--------------|
| 4.56 | 588            | 2.858333         | 146            | 0.9125           | 3.770833        | 0.025782689  |
| 5.59 | 611            | 2.970139         | 164.5          | 1.028125         | 3.998264        | 0.022666088  |
| 5.14 | 756            | 3.675            | 236            | 1.475            | 5.15            | 0.042597087  |
| 6.54 | 885            | 4.302083         | 523.9          | 3.274375         | 7.576458        | -0.027653275 |
| 27   | 1035           | 5.03125          | 614            | 3.8375           | 8.86875         | -0.009709498 |
| 37.8 | 1201           | 5.838194         | 634.8          | 3.9675           | 9.805694        | -0.031968386 |
| 48.5 | 1578           | 7.670833         | 684.3          | 4.276875         | 11.94771        | 0.033671032  |
| 196  | 1810           | 8.798611         | 823.5          | 5.146875         | 13.94549        | 0.048402759  |
| 241  | 2015           | 9.795139         | 1053.1         | 6.581875         | 16.37701        | #VALUE!      |
| 700  | 3026           | 14.70972         | 2275.3         | 14.220625        | 28.93035        | #VALUE!      |

| number | data     | time  | time of<br>AGV | energy of<br>AGV | time of<br>AYC | energy<br>of AYC | total energy |
|--------|----------|-------|----------------|------------------|----------------|------------------|--------------|
| 11     | 7/7/150  | 14.38 | 3066           | 14.904167        | 3572.2         | 22.32625         | 37.23041667  |
| 12     | 7/8/150  | 12.85 | 2847           | 13.839583        | 3722.5         | 23.26563         | 37.10520833  |
| 13     | 7/7/200  | 17.27 | 3808           | 18.511111        | 4756.9         | 29.73063         | 48.24173611  |
| 14     | 8/7/200  | 16.84 | 3537           | 17.19375         | 4569.7         | 28.56063         | 45.754375    |
| 15     | 8/8/250  | 18.79 | 3206           | 15.584722        | 4697.5         | 29.35938         | 44.94409722  |
| 16     | 9/7/250  | 18.93 | 2928           | 14.233333        | 5467.9         | 34.17438         | 48.40770833  |
| 17     | 9/8/300  | 23.65 | 4523           | 21.986806        | 5679.4         | 35.49625         | 57.48305556  |
| 18     | 10/7/300 | 20.54 | 4420           | 21.486111        | 5974.6         | 37.34125         | 58.82736111  |
| 19     | 9/8/400  | 25.49 | 5086           | 24.723611        | 6457.9         | 40.36188         | 65.08548611  |
| 20     | 10/8/400 | 26.83 | 4668           | 22.691667        | 6975.4         | 43.59625         | 66.28791667  |
